# Supplementary material for: Effects of Psilocybin-Assisted Therapy on Major Depressive Disorder: A Randomized Clinical Trial
Source: PubMed Central journal article supplement (PMC7643046; doi:10.1001/jamapsychiatry.2020.3285), 2020-11-04
Supplement: jamapsychiatry-e203285-s001.pdf [file jamapsychiatry-e203285-s001.pdf]

1  
2  
3  
4  
5  
6  
7  
8  
9  
10  
11  
12  
13  
14  
15  
16  
17  
18  
19  
20  
21  
22  
23  
24  
25  
26  
27  
28  
29  
30  
31  
32  
33  
34  
35  
36  
37  
38  
39  
40  
41  
42  
43  
44  
45  
46  
47  
48  
49  
50  
51

**Study Protocol**  
**“Effects of psilocybin therapy for major depressive disorder:  
A randomized clinical trial”**

8 July 2020

Alan K. Davis PhD<sup>a,b</sup>, Frederick S. Barrett PhD<sup>a</sup>, Darrick G. May MD<sup>a</sup>, Mary P. Cosimano MSW<sup>a</sup>,  
Nathan D. Sepeda BS<sup>a</sup>, Matthew W. Johnson PhD<sup>a</sup>, Patrick H. Finan PhD<sup>a</sup>, Roland R. Griffiths  
PhD<sup>a,c</sup>

<sup>a</sup> Center for Psychedelic and Consciousness Research, Department of Psychiatry, Johns Hopkins School of Medicine, 5510 Nathan Shock Drive, Baltimore, MD 21224 USA

<sup>b</sup> College of Social Work, The Ohio State University, Columbus, OH 43210

<sup>c</sup> Department of Neuroscience, Johns Hopkins School of Medicine, 5510 Nathan Shock Drive, Baltimore, MD 21224 USA

**Corresponding Authors:**

Alan K. Davis, Ph.D. and Roland R. Griffiths, PhD., Center for Psychedelic and Consciousness Research, Department of Psychiatry, Johns Hopkins School of Medicine, 5510 Nathan Shock Drive, Baltimore, MD 21224 USA; Tele: 614-292-5251; Email: davis.5996@osu.edu and rgriff@jhmi.edu

## Study Protocol

**Study Overview:** This study will involve a randomized waitlist control design to investigate the rapid and sustained antidepressant effects following two experimental sessions in which an oral dose of psilocybin is administered to patients with major depressive disorder. The study will include clinician and participant ratings of depression and anxiety pre- and post-drug-session, monitor and participant ratings of subjective drug effects during and after each drug session, tests of executive functioning at baseline and post-drug-session, and magnetic resonance imaging (MRI) of the brain at baseline and post-drug-session to assess the effects of psilocybin on cortical glutamate levels, neural response to emotional stimuli, and resting-state functional brain connectivity.

Twenty-four participants will complete two experimental drug sessions. Each session will last approximately eight hours, and experimental sessions will be separated by at least one week. Acute physiological, subjective, and behavioral effects will be assessed during and at the end of sessions (e.g., ratings completed by session monitors and questionnaire measures of subjective effects completed by participants), consistent with our well-established psilocybin session protocols. During the first experimental drug session, each participant will be administered a moderate dose of psilocybin (20 mg/70 kg), but one that we do not expect to have full therapeutic efficacy. The purpose of the first psilocybin session is to familiarize participants with the subjective effects that may be encountered at a higher dose. The first psilocybin session will also allow for assessment of both the suitability of each participant to the study procedures and drug effects, and the safety of administering a higher dose to each participant. The second session will occur about one week after the first session. If the study team decides that the participant can safely be administered the higher dose, then the participant will be given 30 mg/70 kg psilocybin during the second session. If the decision is made that the participant might clinically benefit from another session but not the high dose, the participant will receive 20 mg/70 kg psilocybin on the second session, with the dose determined by the clinical judgment of the study team.

Depressive symptoms will be assessed during visits at our research unit (the Behavioral Pharmacology Research Unit, or BPRU), at baseline and repeatedly after each session. Participants will also be contacted for clinical assessment 3, 6, and 12 months after the second experimental psilocybin session.

**Waitlist Control Condition:** After screening and enrollment, participants will be randomized to an immediate treatment group or a delayed treatment group (waitlist control condition). Participants in the delayed treatment group will wait 8 weeks after enrollment before beginning the study interventions and neuroimaging assessments. As a safety precaution, participants in the delayed treatment group will be assessed weekly via telephone calls or in-person visits during the wait period (i.e., telephone assessments during post-randomization weeks 1, 2, 3, 4, 6, and 7; in-person assessments during post-randomization weeks 5 and 8) to assess depressive symptoms and suicide risk to determine if intervention is warranted (as described in more detail in the section "Steps taken to minimize risk.")

**MRI Assessment:** MRI measures will be collected for all 24 participants at two timepoints: 1. during the week before beginning the first treatment intervention; and 2. one week after the second psilocybin session. Only participants who successfully complete the initial MRI assessment will be eligible for inclusion in the post-treatment MRI assessment. [The MRI data are not reported in this primary study manuscript but will be reported later.]

103 We anticipate the following approximate timeline for study participation:  
104

105 Screening and Preparation

106 Visits 1-2 (BPRU): Medical and psychological screening; cognitive testing; initial  
107 depressive symptom measures. Randomization to immediate or delayed  
108 treatment groups will occur at the end of Visit 2.  
109

110 Telephone and in-person safety assessments for delayed treatment group: As a safety  
111 precaution, participants in the delayed treatment group will be assessed weekly  
112 via telephone calls or in-person visits during the 8-week wait period (i.e.,  
113 telephone assessments during post-randomization weeks 1, 2, 3, 4, 6, and 7; in-  
114 person assessments during post-randomization weeks 5 and 8) to assess  
115 depressive symptoms and suicide risk. For clarity in describing the study  
116 procedures, none of these safety assessments are designated as a study "visit."  
117 In addition to the safety assessments at weeks 5 and 8, primary outcome  
118 assessments (GRID-HAMD) will also be conducted.  
119

120 Visit 3: Immediate treatment group: Initial MRI assessment and neurocognitive testing  
121 (KKI; 1 hour). This visit will occur within about one week after Visit 2.  
122

123 Delayed treatment group: Initial MRI assessment and neurocognitive testing  
124 (KKI; 1 hour). This visit will occur about 8 weeks after Visit 2. In addition to the  
125 brain imaging and neurocognitive testing, depressive symptom measures will be  
126 reassessed in the delayed treatment group (BPRU; 1 hour).  
127

128 Visits 4-5: Preparation for the first psilocybin session consists of 2 meetings over 2  
129 weeks (BPRU; 6 hours total). Visit 4 will occur within about 1 week after Visit 3.  
130 Visit 5 will occur about one week after Visit 4.  
131

132 Psilocybin Session 1 and follow-up visits

133 Visit 6: First psilocybin session (20 mg/70 kg) at BPRU; clinical, physiological, &  
134 behavioral measures (8 hours total). Visit 6 will occur within about 1 week of Visit  
135 5.  
136

137 Visit 7: Post-session 1 integration; meeting with study clinician & staff; clinical &  
138 behavioral measures (BPRU); (2 hours total). Visit 7 will occur within 3 days after  
139 Visit 6.

140 Visit 8: 1-week post-session 1; meeting with study clinician & staff; clinical & behavioral  
141 measures (BPRU) (2 hours total)  
142

143 Psilocybin Session 2 and follow-up visits

144 Visit 9: Second psilocybin session (20 or 30 mg/70 kg) at BPRU; clinical, physiological, &  
145 behavioral measures (8 hours total). Visit 9 will occur within about 1 week of Visit  
146 8.

147 Visit 10: Post-session 2 integration; meeting with study clinician & staff; clinical &  
148 behavioral measures (BPRU); (2 hours total). Visit 10 will occur within 3 days  
149 after Visit 9.

150 Visit 11: Week 1 post-session 2; meeting with study clinician & staff; clinical & behavioral  
151 measures; cognitive testing (BPRU; 3 hours total); brain imaging for all  
152 participants (KKI) (1 hour total)

153 Visit 12: Week 2 post-session 2 – clinical & behavioral ratings

154 Telephone safety assessment: Week 3 post-session 2 – To assure at least weekly  
155 safety assessment for depressive symptoms and suicide risk during the  
156 intervention period (for both treatment groups), there will be one telephone safety  
157 assessment (in between Visits 12 and 13). This telephone safety assessment is  
158 not designated as a study "visit."

159 Visit 13: Week 4 post-session 2 – meeting with study clinician & staff; clinical &  
160 behavioral measures; cognitive testing (BPRU); (3 hours total)

161  
162 Additional visits for immediate treatment group only  
163 Visit 14 & 15: Week 9 & Week 12 post-session 2 – Participants in immediate treatment  
164 group will come to BPRU for assessment of depressive symptoms (1 hour). The  
165 purpose of these visits is to keep the number and timepoints of primary outcome  
166 assessments consistent between treatment groups.

167  
168 Long-term follow-up (LTFU)  
169 LTFU 1: 3 months post-session 2; questionnaire assessments (2 hours total)  
170 LTFU 2: 6-months post-session 2; open-ended clinical interview; questionnaire  
171 assessments (2 hours total)  
172 LTFU 3: 12-months post-session 2; questionnaire assessments (2 hours total)

173  
174 Preparation Meetings with Monitors Before and After Session Days: Before the first session,  
175 participants will meet with one or more of the session monitors on at least 2 occasions, for a  
176 total of about 6 hours of contact time before the first session day. The main purpose of the  
177 participant-monitor meetings is to develop rapport and trust, which we believe helps minimize  
178 the risk of fear or anxiety reactions during the psilocybin sessions. Additional meetings and  
179 contact hours will be scheduled if it is judged necessary to establish rapport and trust.  
180 Consistent with our previous psilocybin protocols, the participant's life history and current  
181 situation in life will be reviewed, and intentions and expectations for the psilocybin sessions will  
182 be discussed. **Details regarding the conduct of the supportive psychotherapy provided have**  
183 **been published elsewhere.**<sup>1</sup>

184  
185 The participant will meet with the session monitor(s) one day and one week after each session  
186 and four weeks after the second session to support integration of session-day experiences.  
187 Additional clinician and monitor contact hours will be scheduled if it is judged that the participant  
188 would benefit from additional meetings in order to discuss experiences from their session(s) or  
189 prepare for the next session.

190  
191 Session Monitor Telephone Meetings: In order to provide ongoing clinical support after the  
192 session experiences, telephone discussions may occur throughout study participation if the  
193 clinician, or monitor judge that this additional support would be helpful.

194  
195 Conduct of Psilocybin Sessions (Visits 6 and 9): Procedures for psilocybin administration and  
196 the conduct of the session will be similar to procedures used in our previous<sup>2,3</sup> and ongoing  
197 studies with psilocybin. Participants will be instructed to consume a low-fat breakfast before  
198 reporting to the laboratory for the psilocybin sessions. Before psilocybin administration, the  
199 participant will provide a urine sample, which will be tested for the presence of abused drugs  
200 (e.g., various opioids, stimulants and sedatives). In addition, a urine pregnancy test will be  
201 conducted in females of child bearing potential. A negative pregnancy test will be required in  
202 order to continue in the study. Participants and staff will also complete pre-session  
203 questionnaires. Before each psilocybin session, study personnel will interview the participant. If

204 the investigator believes that the session is contraindicated, the session will be cancelled or  
205 postponed.

206  
207 Psilocybin will be administered in opaque gelatin capsules with approximately 100 ml water. At  
208 least one session monitor, under the supervision of the investigators, will be present in the room  
209 and available to respond to participants' physical and emotional needs during the full course of  
210 the session (at least 7 hours). A physician on the study team will be immediately available via  
211 pager or mobile phone for at least 3 hours or until the peak effects of psilocybin have subsided,  
212 whichever is longer.

213  
214 During the session, participants will lie on a couch, wear eyeshades, and listen to a program of  
215 music through headphones. The participant will be encouraged to focus her or his attention  
216 inward. The eyeshades and music are intended to encourage this inward reflection.

217  
218 Heart rate and blood pressure will be measured pre drug administration, at 30, 60, 90, 120  
219 minutes after drug administration, and then at least hourly until at least 6 hours after drug  
220 administration and until drug effects have subsided. Heart rate and blood pressure assessments  
221 will be obtained after the participant has been sitting or recumbent for at least 5 minutes.  
222 Sessions are expected to last approximately 7 to 10 hours.

223  
224 At about the same time of each heart rate/blood pressure measurement, monitors will complete  
225 questionnaires to rate the presence and intensity of behaviors, signs, and reported symptoms,  
226 including sleepiness, amount of speech, anxiety, stimulation/arousal, tearing/crying,  
227 nausea/vomiting, yawning, restlessness, feelings of unreality, visual changes, euphoria, and  
228 peacefulness. Video and audio recordings will be made throughout the session.

229  
230 At the end of the experimental session, participants will complete paper or computer-based  
231 questionnaires designed to assess acute subjective experiences associated with the psilocybin  
232 session. Study monitors will complete assessments of mood and safety. Subjects will also be  
233 asked to write a narrative description of the experience of the psilocybin session before their  
234 next in-person meeting.

235  
236 In-person post-session meetings (Visits 7, 8, 10, and 11): During the meetings with the monitors  
237 after each session (1-3 days post-session, or Visits 7 and 10, and 1 week post-session, or Visits  
238 8 and 11), participants will complete questionnaire assessment measures. During visits 7 and  
239 10, the monitors will also complete questionnaires retrospectively rating various behaviors and  
240 experiences observed on the session day and reported by the participant during the meeting  
241 (e.g., Next-Day Monitor Rating Form), and participants will be asked to recite and discuss the  
242 narrative description of their most recent psilocybin session.

243  
244 Long-term follow-up visits: [Long-term follow-up assessment is ongoing and results will be  
245 reported later.]

246  
247 Timing and Location of Meetings, Sessions, and Measures: Although much effort is put in to  
248 scheduling volunteers within the stated time frames, these are only estimates. Variables out of  
249 the study team's control (e.g., volunteer availability, university closings, availability of study  
250 rooms, illness) may prevent the scheduling of volunteers within the stated time frame goals.  
251 There is no evidence to suggest that the difference in timing of sessions, meetings, and  
252 measures will adversely affect the volunteer or the validity of the study. On those occasions  
253 when the timing of meetings, sessions or measures deviate substantially from the time frames in  
254 the protocol, we will report these as deviations in the Continuing Review.

255  
256  
257  
258  
259  
260  
261  
262  
263  
264  
265  
266  
267  
268  
269  
270  
271  
272  
273  
274  
275  
276  
277  
278  
279  
280  
281  
282  
283  
284  
285  
286  
287  
288  
289  
290  
291  
292  
293  
294  
295  
296  
297  
298  
299  
300  
301  
302  
303  
304  
305

## **Inclusion/Exclusion Criteria**

Overview of Screening Procedures: Participants will be initially screened via telephone or an online questionnaire to determine whether they meet major inclusion/exclusion criteria, and thus whether they are eligible for an in-person screening session.

Participants who do not fail telephone or online screening will be invited to BPRU on the Johns Hopkins Bayview Campus for in-person screening.

Written informed consent will be obtained at the BPRU at a scheduled meeting after participants have passed telephone screening. Participants will be allowed to take as much time as necessary to decide whether or not to sign the consent form. Study staff will discuss the consent form with the participant after the participant has read the consent form. Study staff will ask questions to assess the individual's understanding of the consent form. Participants may take the consent form home to review and return to sign consent if they wish.

Participants will be physically healthy adult participants (approximately equal numbers of males and females) 21 to 75 years old who have a DSM-5 diagnosis of major depressive disorder, and are currently experiencing a major depressive episode. Potential participants will self-report their history of antidepressant use and the effectiveness of antidepressant use during the initial telephone or online screening. Persons currently taking an antidepressant will be excluded at this initial screening. Potential participants that have previously used antidepressant medications will provide a written list of these medications.

Non-English speakers and those with language or hearing impairments will not participate in the study. Participants will be recruited primarily from the Baltimore/Washington DC area. Participants may or may not have used hallucinogens in the past. Potential participants will be carefully screened to eliminate those with significant medical or psychiatric illnesses other than major depressive disorder (see below for specific inclusion/exclusion criteria).

Screening evaluation will include a history and physical examination, ECG, a 30 cc blood draw for study measures and medical screening, a personal and family medical history questionnaire, psychiatric/psychological assessments, and a urine drug test. As per standard BPRU screening procedures, screening physical examination and ECGs will be performed by BPRU medical staff (nurse, mid-level, or physician). ECGs will be interpreted by cardiologists credentialed and privileged to read ECGs at Bayview Medical Center to determine if a significant abnormality exists. Participants will be requested to refrain from illicit drug use during the course of the study and a urine test will be conducted before each drug session (e.g., testing for various opioids, stimulants and sedatives). Pregnant or nursing women are ineligible; female participants will receive a urine pregnancy test at intake and before each drug session, and must use effective methods of contraception during the study. Psychiatric screening will be conducted by study team members. Psychoactive drug-use history, history of antidepressant treatments, and information about employment status and current functioning (including mood and psychological and psychosomatic symptoms) will be obtained. All inclusion and exclusion criteria are described below.

Based on testing and interviews, if a psychiatric/psychological problem of a crisis nature (e.g., acute psychosis or suicidal intent) is discovered during screening, we will refer that individual to the Emergency Department for treatment.

306 Study participants will not be enrolled if they are currently taking antidepressant medication.  
307 Study physicians will assume the role of mental health provider upon participants enrolling in the  
308 study through the final primary outcome timepoint (Visit 13, 4 weeks post-psilocybin session 2).  
309

310 Inclusion criteria:

- 311 • 21 to 75 years old
- 312 • Have given written informed consent
- 313 • Have at least a high-school level of education or equivalent (e.g. GED).
- 314 • Have a confirmed DSM-5 diagnosis of Major Depressive Disorder and currently  
315 experiencing a major depressive episode.
- 316 • Have a baseline GRID-HAMD score greater than or equal to 17.
- 317 • No antidepressant medication for at least 2 weeks (4 weeks for fluoxetine) prior to  
318 enrollment.
- 319 • Be judged by study team clinicians to be at low risk for suicidality
- 320 • Concurrent psychotherapy is allowed if the type and frequency of the therapy has  
321 been stable for at least two months prior to screening and is expected to remain  
322 stable during participation in the study.
- 323 • Be medically stable as determined by screening for medical problems via a personal  
324 interview, a medical questionnaire, a physical examination, an electrocardiogram  
325 (ECG), and routine medical blood and urinalysis laboratory tests
- 326 • Agree to consume approximately the same amount of caffeine-containing beverage  
327 (e.g., coffee, tea) that he/she consumes on a usual morning, before arriving at the  
328 research unit on the mornings of drug session days. If the participant does not  
329 routinely consume caffeinated beverages, he/she must agree not to do so on session  
330 days.
- 331 • Agree to refrain from using any psychoactive drugs, including alcoholic beverages  
332 and nicotine, within 24 hours of each drug administration. The exception is caffeine.  
333 Participants will be required to be non-smokers.
- 334 • Agree not to take any PRN medications on the mornings of drug sessions
- 335 • Agree not to take sildenafil (Viagra<sup>®</sup>), tadalafil, or similar medications within 72 hours  
336 of each drug administration.
- 337 • Agree that for one week before each drug session, he/she will refrain from taking any  
338 nonprescription medication, nutritional supplement, or herbal supplement except  
339 when approved by the study investigators. Exceptions will be evaluated by the study  
340 investigators and will include acetaminophen, non-steroidal anti-inflammatory drugs,  
341 and common doses of vitamins and minerals.
- 342 • Have limited lifetime use of hallucinogens (the following criteria are preferred: no use  
343 in the past 5 years; total hallucinogen use less than 10 times)

344  
345 General medical exclusion criteria:

- 346 • Women who are pregnant (as indicated by a positive urine pregnancy test assessed  
347 at intake and before each drug session) or nursing; women who are of child-bearing  
348 potential and sexually active who are not practicing an effective means of birth  
349 control.
- 350 • Cardiovascular conditions: coronary artery disease, stroke, angina, uncontrolled  
351 hypertension, a clinically significant ECG abnormality (e.g., atrial fibrillation),  
352 prolonged QTc interval (i.e., QTc > 450 msec), artificial heart valve, or TIA in the past  
353 year
- 354 • Epilepsy with history of seizures

- 355 • Insulin-dependent diabetes; if taking oral hypoglycemic agent, then no history of
- 356 hypoglycemia
- 357 • Currently taking psychoactive prescription medication on a regular (e.g., daily) basis
- 358 • Currently taking on a regular (e.g., daily) basis any medications having a primary
- 359 centrally-acting serotonergic effect, including MAOIs. For individuals who have
- 360 intermittent or PRN use of such medications, psilocybin sessions will not be
- 361 conducted until at least 5 half-lives of the agent have elapsed after the last dose.
- 362 • More than 25% outside the upper or lower range of ideal body weight according to
- 363 Metropolitan Life height and weight table

364  
365 Psychiatric Exclusion Criteria:

- 366 • Current or past history of meeting DSM-5 criteria for schizophrenia spectrum or other
- 367 psychotic disorders (except substance/medication-induced or due to another medical
- 368 condition), or Bipolar I or II Disorder
- 369 • Current or history within one year of meeting DSM-5 criteria for a moderate or severe
- 370 alcohol, tobacco, or other drug use disorder (excluding caffeine)
- 371 • Have a first or second-degree relative with schizophrenia spectrum or other
- 372 psychotic disorders (except substance/medication-induced or due to another medical
- 373 condition), or Bipolar I or II Disorder
- 374 • Has a psychiatric condition judged to be incompatible with establishment of rapport
- 375 or safe exposure to psilocybin
- 376 • History of a medically significant suicide attempt
- 377 • Has failed to respond to electroconvulsive therapy during the current major
- 378 depressive episode
- 379 • Current antidepressant use

380  
381 Additional MRI Exclusion Criteria:

- 382 • Head trauma
- 383 • Claustrophobia incompatible with scanning
- 384 • Cardiac pacemaker
- 385 • Implanted cardiac defibrillator
- 386 • Aneurysm brain clip
- 387 • Inner ear implant
- 388 • Prior history as a metal worker and/or certain metallic objects in the body -- must
- 389 complete MRI screening form (see eIRB Study Documents) and be approved by MRI
- 390 technologist before each scan
- 391 • History of clinically significant vertigo, seizure disorder, middle ear disorder, or
- 392 double vision
- 393 • Poor vision not adequately corrected (in order to complete emotional processing
- 394 task)

395  
396 **Drugs/ Substances/ Devices**

397  
398 Psilocybin dose: All participants will receive a moderate dose of 20 mg/70 kg on the first

399 psilocybin session. The psilocybin dose for the second session will be increased to 30 mg/70 kg

400 unless a participant experiences a strong unpleasant reaction during the first session and the

401 clinical judgment of the study team is that the given participant would have a similar or greater

402 reaction at a higher dose that would reduce the possible therapeutic benefits of psilocybin.

403  
404 **Primary outcome variable.**



405  
406 Depression Measures: The primary outcome measure for depressive symptoms is the 17-item  
407 GRID-Hamilton Depression Rating Scale (GRID-HAMD)<sup>4,5</sup> assessed by blinded clinician raters.  
408 All participants will have this measured at screening (Visit 2), at post-randomization weeks 5, 8,  
409 13, and 16, and at long-term follow-ups. Post-randomization weeks 5 and 8 correspond to the  
410 primary endpoints of 1 and 4 weeks post-psylocybin session 2 for the immediate treatment  
411 group; weeks 13 and 16 correspond to primary endpoints for the delayed treatment group.  
412 Having the same number and timepoints of primary outcome assessments will allow for  
413 between-group comparisons. This scale assesses severity of depressive symptoms with a  
414 higher score indicating more severe depression. Screening measurements for the immediate  
415 treatment group will be considered as baseline measurements for this group, and  
416 measurements at the end of the wait period for the delayed treatment group will be considered  
417 baseline measurements for this group for the purposes of assessing treatment outcomes.

418  
419 **Secondary outcome variables.**

420  
421 Depression Measures: Secondary outcome measures for depressive symptoms are the Beck  
422 Depression Inventory II (BDI-II),<sup>6</sup> the 9-item Patient Health Questionnaire (PHQ-9),<sup>7</sup> and the  
423 Quick Inventory of Depressive Symptomatology – Self Rated (QIDS-SR).<sup>8,9</sup> These will be  
424 administered at the same timepoints as the primary depression measures.

425  
426 Safety Measures: The Columbia Suicide Severity Rating Scale (C-SSRS)<sup>10</sup> will be used to  
427 assess severity of suicide ideation during every in-person visit. It was developed by researchers  
428 at Columbia University and is widely used in clinical and research settings  
429 ([www.cssrs.columbia.edu](http://www.cssrs.columbia.edu)). As a safety precaution, participants in the delayed treatment group  
430 will have weekly assessments of depressive symptoms (using the PHQ-9) and suicide risk  
431 (using the C-SSRS) to determine if intervention is warranted.

432  
433 Measures taken throughout each drug session:

434  
435 *Heart rate and blood pressure:* Vital signs will be assessed before capsule  
436 administration and at 30, 60, 90, 120, 180, 240, 300, and 360 minutes after capsule  
437 administration.

438  
439 *Within-session Monitor Rating Form:* At the same time points at which the heart rate and  
440 blood pressure will be taken, the two session monitors will complete the Monitor Rating  
441 Form, which involves rating or scoring several dimensions of the participant's behavior  
442 and mood.

443  
444 *Video and audio recordings:* Video and audio recordings may be taken throughout the  
445 drug sessions and will be reviewed by investigators.

446  
447 Measures taken about 7 hours after capsule administration:

448  
449 *Mystical Experience Questionnaire (MEQ30)<sup>11,12</sup>*

450  
451 *Challenging Experience Questionnaire (CEQ27)<sup>13</sup>*

452  
453 Longitudinal measures assessed at baseline, post-session time-points, and follow-up:

454

455 *Anxiety and emotion regulation rating scales:* Participants will complete a number of  
456 questionnaires that assess anxiety (State Trait Anxiety Inventory, or STAI,<sup>14</sup> and  
457 Hamilton Anxiety Inventory, or HAM-A)<sup>15</sup> during screening and 1 week and 4 weeks after  
458 Session 2.

459

460 Measures taken 4 weeks, 3 months, 6 months, and 12 months after Session 2:

461

462 *Persisting Effects Questionnaire:* This questionnaire was developed to assess  
463 attributions that participants retrospectively make with respect to the psilocybin  
464 experience.<sup>2,3,16</sup>

465

466 *Monitor Rating of Enduring Effects:* This questionnaire will assess the monitors'  
467 observations of persisting effects of sessions on participant attitudes and behaviors.

468

469 Measures taken at baseline only:

470

471 *Antidepressant Treatment Response Questionnaire (ATRQ):* If a participant has a  
472 history of antidepressant use, we will use the ATRQ to determine effectiveness of past  
473 trials for purposes of characterizing that participant's degree of treatment-resistance.<sup>17-20</sup>

474

475 [Other tertiary measures were examined in this trial that are not reported here. These measures  
476 will be included in forthcoming manuscripts.]

477

478 **Statistical plan.**

479

480 *Questionnaire Measures:* Repeated-measures ANOVA will be used when appropriate to assess  
481 change between groups and over time within groups in primary and secondary longitudinal  
482 questionnaire outcome measures, including measures of depressive symptoms and executive  
483 function. Planned comparisons will be used to test for early antidepressant effects (between  
484 baseline and 1-week post-session ratings), and to test for sustained antidepressant effects  
485 (between baseline and 4-week post-session ratings) of psilocybin. Planned comparisons will  
486 also be used to investigate change in questionnaire and executive function test scores between  
487 pre-session (e.g. Visits 2, 5 and 8) and post-session (e.g. Visits 7, and 10 - 15) timepoints for  
488 secondary outcome measures, and between depressive assessments of immediate and  
489 delayed treatment groups at 5 and 8 weeks post-randomization. We will also assess  
490 correlations between primary and secondary outcome measures.

491

492 **References**

- 493 1. Johnson MW, Richards WA, Griffiths RR. Human hallucinogen research: guidelines for  
494 safety. *J Psychopharmacol (Oxf)*. 2008;22(6):603-620. doi:10.1177/0269881108093587
- 495 2. Griffiths RR, Richards WA, McCann U, Jesse R. Psilocybin can occasion mystical-type  
496 experiences having substantial and sustained personal meaning and spiritual significance.  
497 *Psychopharmacology (Berl)*. 2006;187(3):268-283. doi:10.1007/s00213-006-0457-5
- 498 3. Griffiths RR, Johnson MW, Richards WA, Richards BD, McCann U, Jesse R. Psilocybin  
499 occasioned mystical-type experiences: immediate and persisting dose-related effects.  
500 *Psychopharmacology (Berl)*. 2011;218(4):649-665. doi:10.1007/s00213-011-2358-5
- 501 4. Hamilton M. A rating scale for depression. *J Neurol Neurosurg Psychiatry*. 1960;23(1):56-  
502 62. doi:10.1136/jnnp.23.1.56
- 503 5. Williams JBW, Kobak KA, Bech P, et al. The GRID-HAMD: standardization of the Hamilton  
504 Depression Rating Scale. *Int Clin Psychopharmacol*. 2008;23(3):120-129.  
505 doi:10.1097/YIC.0b013e3282f948f5
- 506 6. Beck AT, Steer RA, Ball R, Ranieri WF. Comparison of Beck Depression Inventories-IA  
507 and-II in psychiatric outpatients. *J Pers Assess*. 1996;67(3):588-597.  
508 doi:10.1207/s15327752jpa6703\_13
- 509 7. Kroenke K, Spitzer RL. The PHQ-9: a new depression diagnostic and severity measure.  
510 *Psychiatr Ann*. 2002;32(9):509-515. doi:10.3928/0048-5713-20020901-06
- 511 8. Lenderking WR, Hu M, Tennen H, Cappelleri JC, Petrie CD, Rush AJ. Daily process  
512 methodology for measuring earlier antidepressant response. *Contemp Clin Trials*.  
513 2008;29(6):867-877. doi:10.1016/j.cct.2008.05.012
- 514 9. Rush AJ, Trivedi MH, Ibrahim HM, et al. The 16-Item quick inventory of depressive  
515 symptomatology (QIDS), clinician rating (QIDS-C), and self-report (QIDS-SR): a  
516 psychometric evaluation in patients with chronic major depression. *Biol Psychiatry*.  
517 2003;54(5):573-583. doi:10.1016/S0006-3223(02)01866-8
- 518 10. Posner K, Brent D, Lucas C, et al. *Columbia-Suicide Severity Rating Scale (C-SSRS)*.  
519 Columbia University Medical Center; 2008.
- 520 11. MacLean KA, Johnson MW, Griffiths RR. Mystical experiences occasioned by the  
521 hallucinogen psilocybin lead to increases in the personality domain of openness. *J*  
522 *Psychopharmacol (Oxf)*. 2011;25(11):1453-1461. doi:10.1177/02698811111420188
- 523 12. Barrett FS, Johnson MW, Griffiths RR. Validation of the revised Mystical Experience  
524 Questionnaire in experimental sessions with psilocybin. *J Psychopharmacol (Oxf)*.  
525 2015;29(11):1182-1190. doi:10.1177/0269881115609019
- 526 13. Barrett FS, Bradstreet MP, Leoutsakos J-MS, Johnson MW, Griffiths RR. The Challenging  
527 Experience Questionnaire: Characterization of challenging experiences with psilocybin

- 528 mushrooms. *J Psychopharmacol (Oxf)*. 2016;30(12):1279-1295.  
529 doi:10.1177/0269881116678781
- 530 14. Spielberger CD, Sydeman SJ. State-Trait Anxiety Inventory and State-Trait Anger  
531 Expression Inventory. In: *The Use of Psychological Testing for Treatment Planning and*  
532 *Outcome Assessment*. Lawrence Erlbaum Associates, Inc; 1994:292-321.
- 533 15. Hamilton M. The assessment of anxiety states by rating. *Br J Med Psychol*. 1959;32(1):50-  
534 55. doi:10.1111/j.2044-8341.1959.tb00467.x
- 535 16. Griffiths R, Richards W, Johnson M, McCann U, Jesse R. Mystical-type experiences  
536 occasioned by psilocybin mediate the attribution of personal meaning and spiritual  
537 significance 14 months later. *J Psychopharmacol (Oxf)*. 2008;22(6):621-632.  
538 doi:10.1177/0269881108094300
- 539 17. Chandler GM, Iosifescu DV, Pollack MH, Targum SD, Fava M. Research: validation of the  
540 Massachusetts General Hospital Antidepressant Treatment History Questionnaire (ATRQ):  
541 Validation of the MGH ATRQ. *CNS Neurosci Ther*. 2010;16(5):322-325.  
542 doi:10.1111/j.1755-5949.2009.00102.x
- 543 18. Thase ME, Youakim JM, Skuban A, et al. Efficacy and Safety of Adjunctive Brexpiprazole  
544 2 mg in Major Depressive Disorder: A Phase 3, Randomized, Placebo-Controlled Study in  
545 Patients With Inadequate Response to Antidepressants. *J Clin Psychiatry*.  
546 2015;76(09):1224-1231. doi:10.4088/JCP.14m09688
- 547 19. Ball SG, Ferguson MB, Martinez JM, et al. Efficacy Outcomes From 3 Clinical Trials of  
548 Edivoxetine as Adjunctive Treatment for Patients With Major Depressive Disorder Who Are  
549 Partial Responders to Selective Serotonin Reuptake Inhibitor Treatment. *J Clin Psychiatry*.  
550 2016;77(05):635-642. doi:10.4088/JCP.14m09619
- 551 20. Ionescu DF, Swee MB, Pavone KJ, et al. Rapid and Sustained Reductions in Current  
552 Suicidal Ideation Following Repeated Doses of Intravenous Ketamine: Secondary Analysis  
553 of an Open-Label Study. *J Clin Psychiatry*. 2016;77(06):e719-e725.  
554 doi:10.4088/JCP.15m10056

555
