# Supplementary material for: Effects of Psilocybin-Assisted Therapy on Major Depressive Disorder: A Randomized Clinical Trial
Source: PubMed Central journal article supplement (PMC7643046; doi:10.1001/jamapsychiatry.2020.3285), 2020-11-04
Supplement: jamapsychiatry-e203285-s003.pdf [file jamapsychiatry-e203285-s003.pdf]

## Data Sharing Statement

Davis. Effects of Psilocybin-Assisted Therapy on Major Depressive Disorder. *JAMA Psychiatry*. Published November 04, 2020. 10.1001/jamapsychiatry.2020.3285

### Data

**Data available:** No

### Additional Information

**Explanation for why data not available:** The trial is ongoing to collect long-term follow-up data from trial participants. Data will be made available upon request to the corresponding author.
